# Supplementary material
Source: publisher site journal article supplement (https://e-cmh.org/upload/media/cmh-2024-0042-Supplementary-Table-1.pdf)
Supplement: Supplementary file 1 [file cmh-2024-0042-Supplementary-Table-1.pdf]

**Supplementary Table 1.** Primer sequences for qRT–PCR

| Gene     | Forward                      | Reverse                      |
|----------|------------------------------|------------------------------|
| CD70     | 5'-TGTAACAGCTGGAACCTCAGT-3'  | 5'-TGGATGCAAGATGCGGGATT-3'   |
| LGALS1   | 5'-AGCAGCGGGAGGCTGTCTTTC-3'  | 5'-ATCCATCTGGCAGCTTGACGGT-3' |
| LGALS9   | 5'-AGTCCAGCTGTCCCCTTTC-3'    | 5'-CACACCACGTACCCTCCATC-3'   |
| SH3PXD2B | 5'-TCAGGTTGGTGGTTCGTAG-3'    | 5'-TCTCCTTCTTCAGGCTGC-3'     |
| C1QA     | 5'-GAGTTGACAACAGGAGGCAGAG-3' | 5'-CTTTCTCCCGTCTGGTGCT-3'    |
| GAPDH    | 5'-AGTATGACAACAGCCTCAAG-3'   | 5'-TCATGAGTCCTCCACGATA-3'    |
